# Supplementary material for: Synthesis, structure and lithium-ion conductivity of Li2−2xMg2+x(MoO4)3and Li3M(MoO4)3(MIII= Cr, Fe)
Source: Royal Society of Chemistry journal article supplement (doi:10.1039/b301189e), 2003-01-01
Supplement: b301189e.pdf [file b301189e.pdf]

## Supplementary Information

Paper Ref.: B301189E

For deposition with RSC Electronic Supplementary Information service

**Table S1** Anisotropic displacement parameters<sup>a</sup> ( $\text{\AA}^2$ ) in  $\text{Li}_2\text{Mg}_2(\text{MoO}_4)_3$

| Atom | $U_{11}$   | $U_{22}$   | $U_{33}$   | $U_{12}$   | $U_{13}$   | $U_{23}$    |
|------|------------|------------|------------|------------|------------|-------------|
| Mo1  | 0.0080(1)  | 0.0071(1)  | 0.0065(1)  | 0          | 0.0001(1)  | 0           |
| Mo2  | 0.00933(9) | 0.00716(8) | 0.00785(8) | 0.00082(9) | 0.00038(9) | -0.00100(7) |
| O1   | 0.0134(9)  | 0.0113(9)  | 0.0113(8)  | -0.0021(8) | -0.0001(7) | 0.0006(8)   |
| O2   | 0.014(1)   | 0.013(1)   | 0.006(1)   | 0          | 0.002(1)   | 0           |
| O3   | 0.0102(8)  | 0.0094(8)  | 0.0119(8)  | 0.0010(7)  | 0.0010(7)  | -0.0021(7)  |
| O4   | 0.011(1)   | 0.010(1)   | 0.011(1)   | 0          | 0.000(1)   | 0           |
| O5   | 0.0113(8)  | 0.0096(8)  | 0.0110(7)  | 0.0004(8)  | 0.0015(7)  | -0.0026(7)  |
| O6   | 0.0108(9)  | 0.0139(9)  | 0.0101(8)  | 0.0004(8)  | 0.0020(7)  | 0.0009(7)   |
| O7   | 0.0145(9)  | 0.0148(9)  | 0.0143(9)  | 0.0024(8)  | -0.0004(8) | 0.0038(8)   |

<sup>a</sup>The form of the anisotropic displacement parameter is:

$$\exp[-2\pi^2 (h^2 a^{*2} U_{11} + k^2 b^{*2} U_{22} + l^2 c^{*2} U_{33} + 2hka^* b^* U_{12} + 2hla^* c^* U_{13} + 2klb^* c^* U_{23})]$$

**For deposition with ICDD**

**Table S2** X-ray powder diffraction data\* for  $\text{Li}_2\text{Mg}_2(\text{MoO}_4)_3$

| $h$ | $k$ | $l$ | $d_{obs}(\text{Å})$ | $d_{cal}(\text{Å})$ | $I_{obs}(\%)$ | $I_{rel}(\%)$ | $h$ | $k$ | $l$ | $d_{obs}(\text{Å})$ | $d_{cal}(\text{Å})$ | $I_{obs}(\%)$ | $I_{rel}(\%)$ |
|-----|-----|-----|---------------------|---------------------|---------------|---------------|-----|-----|-----|---------------------|---------------------|---------------|---------------|
| 0   | 2   | 0   | 5.220               | 5.232               | 10            | 7             | 1   | 4   | 4   | 2.051               | 2.059               | 7             | 9             |
| 0   | 1   | 3   | 5.107               | 5.122               | 12            | 7             | 2   | 2   | 4   | 2.038               | 2.038               | 5             | 5             |
| 0   | 2   | 2   | 4.498               | 4.498               | 15            | 10            | 2   | 3   | 3   | 1.943               | 1.946               | 6             | 10            |
| 1   | 1   | 1   | -                   | 4.448               | -             | 20            | 2   | 0   | 6   | 1.925               | 1.929               | 6             | 6             |
| 1   | 0   | 2   | 4.425               | 4.425               | 30            | 11            | 1   | 5   | 1   | 1.922               | 1.925               | 8             | 9             |
| 0   | 3   | 1   | 3.411               | 3.422               | 16            | 17            | 1   | 3   | 7   | 1.891               | 1.896               | 6             | 9             |
| 1   | 2   | 2   | 3.367               | 3.379               | 100           | 100           | 1   | 2   | 8   | 1.883               | 1.887               | 7             | 16            |
| 0   | 2   | 4   | 3.367               | 3.370               | 100           | 20            | 1   | 5   | 3   | 1.834               | 1.839               | 5             | 9             |
| 0   | 1   | 5   | 3.335               | 3.340               | 55            | 16            | 2   | 4   | 0   | 1.828               | 1.829               | 7             | 14            |
| 1   | 0   | 4   | 3.335               | 3.339               | 55            | 57            | 1   | 4   | 6   | 1.824               | 1.825               | 9             | 11            |
| 0   | 3   | 3   | 2.986               | 2.999               | 8             | 8             | 2   | 2   | 6   | 1.807               | 1.810               | 12            | 24            |
| 0   | 0   | 6   | 2.928               | 2.937               | 6             | 6             | 1   | 1   | 9   | -                   | 1.801               | -             | 9             |
| 1   | 3   | 1   | 2.833               | 2.844               | 6             | 6             | 0   | 5   | 5   | 1.797               | 1.799               | 7             | 9             |
| 0   | 4   | 0   | 2.608               | 2.616               | 7             | 10            | 0   | 0   | 10  | -                   | 1.762               | -             | 7             |
| 1   | 3   | 3   | 2.579               | 2.587               | 12            | 17            | 1   | 6   | 2   | 1.619               | 1.622               | 6             | 13            |
| 0   | 2   | 6   | 2.560               | 2.561               | 17            | 16            | 1   | 4   | 8   | 1.598               | 1.601               | 4             | 8             |
| 2   | 0   | 0   | 2.560               | 2.558               | 17            | 14            | 2   | 3   | 7   | 1.593               | 1.595               | 7             | 8             |
| 1   | 0   | 6   | 2.537               | 2.547               | 8             | 10            | 3   | 2   | 2   | 1.593               | 1.594               | 7             | 10            |
| 1   | 4   | 1   | 2.301               | 2.309               | 5             | 7             | 3   | 0   | 4   | 1.588               | 1.590               | 8             | 6             |
| 2   | 2   | 2   | 2.217               | 2.224               | 6             | 9             | 1   | 2   | 10  | 1.588               | 1.587               | 8             | 7             |

\*Reflections with  $I_{rel} < 5$  have been omitted
